# Supplementary material for: Increased Expression of α-Hemoglobin Stabilizing Protein (AHSP) mRNA in Erythroid Precursor Cells Isolated from β-Thalassemia Patients Treated with Sirolimus (Rapamycin)
Source: MDPI journal article supplement (doi:10.3390/jcm13092479), 2024-04-24
Supplement: s1 [file s1]

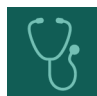

Article

# Increased Expression of $\alpha$ -Hemoglobin Stabilizing Protein (AHSP) mRNA in Erythroid Precursor Cells Isolated from $\beta$ -Thalassemia Patients Treated with Sirolimus (Rapamycin)

Matteo Zurlo <sup>1</sup>, Cristina Zuccato <sup>1,2</sup>, Lucia Carmela Cosenza <sup>1</sup>, Maria Rita Gamberini <sup>2</sup>, Alessia Finotti <sup>1,2,\*</sup> and Roberto Gambari <sup>1,2,\*</sup>

<sup>1</sup> Department of Life Sciences and Biotechnology, Ferrara University, 44121 Ferrara, Italy; matteo.zurlo@unife.it (M.Z.); cristina.zuccato@unife.it (C.Z.); luciacarmela.cosenza@unife.it (L.C.C.)

<sup>2</sup> Center “Chiara Gemmo and Elio Zago” for the Research on Thalassemia, Department of Life Sciences and Biotechnology, Ferrara University, 44121 Ferrara, Italy; gamberinimariarita@gmail.com

\* Correspondence: alessia.finotti@unife.it (A.F.); gam@unife.it (R.G.)

## SUPPLEMENTARY MATERIAL

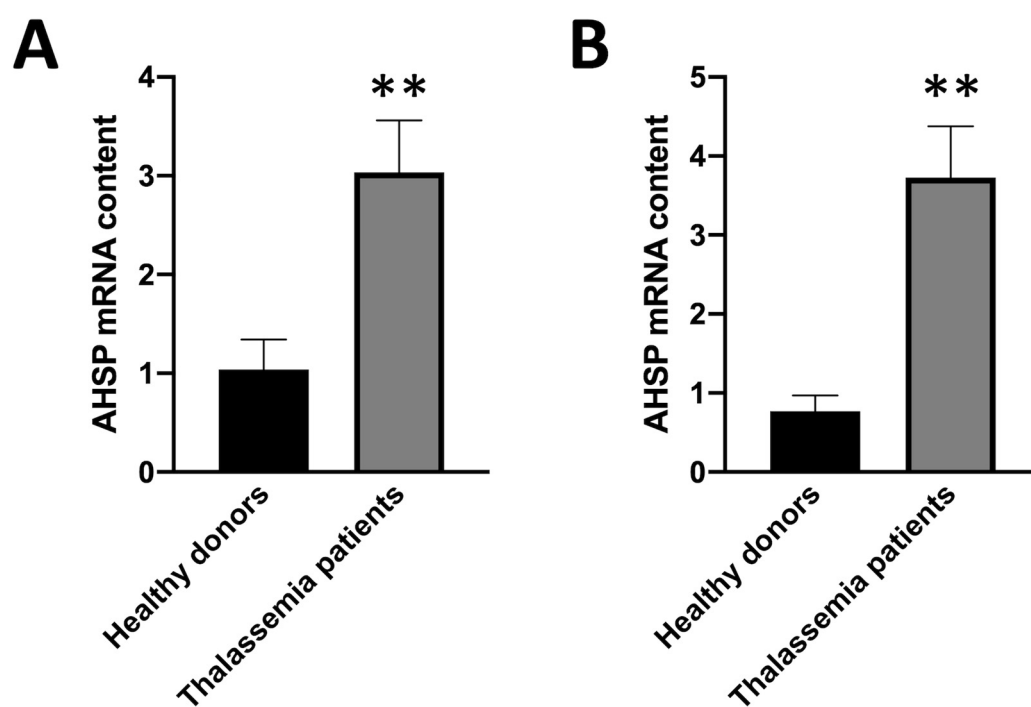

**Figure S1.** Expression of AHSP in Erythroid Precursor Cells (ErPCs) isolated from healthy subjects and  $\beta$ -thalassemia patients. We report the RT-qPCR analysis showed in Figure 1 of the main text but normalized on RPL13A (A) and  $\beta$ -actin (B) as reference sequences, showing high reproducible data. Statistical data were generated using the Prism Software v9.02 and unpaired t-test.

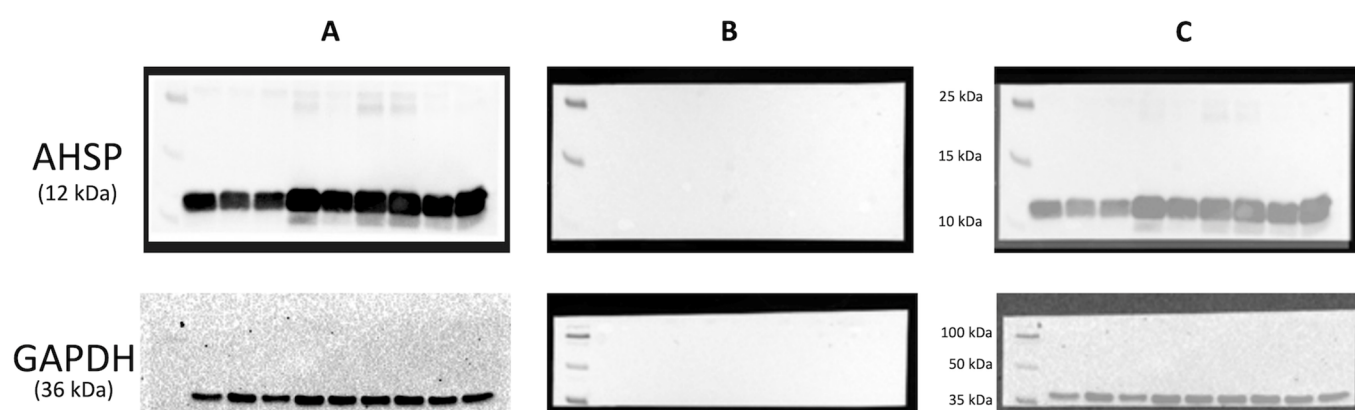

**Figure S2.** Uncropped version of Western Blot presented in Figure 1. In panel A we show the acquired blot image, in panel B the nitrocellulose membrane with the prestained multicolor protein ladder (Spectra pre-stained ladder by Thermo Fisher, Waltham, MA, USA, cat. n. 26634) and in panel C the merge of picture A and B, showing the exact molecular weight of the target proteins.
